# Supplementary material
Source: publisher figshare collection journal article supplement (https://sage.figshare.com/ndownloader/files/22809812)
Supplement: Supplementary file 1 [file 22809812]

Table A1

|                                                           |                                         |                                     | <b>Oct 7, 09</b>               | <b>May 6, 12</b>               | <b>Jun 17, 12</b>                 | <b>Jan 25, 15</b>              | <b>Sep 20, 15</b>             |
|-----------------------------------------------------------|-----------------------------------------|-------------------------------------|--------------------------------|--------------------------------|-----------------------------------|--------------------------------|-------------------------------|
| <b>Electoral Institutions:</b>                            |                                         |                                     | Reinforced<br>PR- open<br>list | Reinforced<br>PR               | Reinforced<br>PR -<br>closed list | Reinforced<br>PR               | Reinforced PR-<br>closed list |
|                                                           |                                         |                                     | 40 seats<br>bonus              | open list<br>50 seats<br>bonus | 50 seats<br>bonus                 | open list<br>50 seats<br>bonus | 50 seats bonus                |
| <b>Effective Number of parties:</b>                       |                                         |                                     | 3.16                           | 8.95                           | 5.2                               | 4.43                           | 4.51                          |
| <b>Total Electoral Volatility:</b>                        |                                         |                                     | 9.95                           | 48.5                           | 18.7                              | 20.5                           | -                             |
| <b>Electoral Volatility from<br/>New Party Formation:</b> |                                         |                                     | 0                              | 12.85                          | 2                                 | 8.85                           | -                             |
| <b>PARTY Name and<br/>Characteristics</b>                 |                                         |                                     | <i>% of votes</i>              | <i>% of votes</i>              | <i>% of votes</i>                 | <i>% of votes</i>              | <i>% of votes</i>             |
| <b>New Democracy</b>                                      | Governing Cartel                        | Center-right<br>Christian Democracy | 33.5                           | 18.9                           | 29.7                              | 27.8                           | 28.1                          |
| <b>PASOK</b>                                              | Governing Cartel                        | Center-left<br>Social-democracy     | 43.9                           | 13.2                           | 12.3                              | 4.7                            | 6.3                           |
| <b>SYRIZA</b>                                             | Populist<br>Challenger of the<br>Cartel | Radical left                        | 4.6                            | 16.8                           | 26.9                              | 36.3                           | 35.5                          |
| <b>ANEL</b>                                               | Governing Cartel<br>ND splinter         | Radical Right                       | -                              | 10.6                           | 7.5                               | 4.8                            | 3.7                           |
| <b>Golden Dawn</b>                                        | Outside of the<br>cartel                | Extreme Right                       | -                              | 7                              | 6.9                               | 6.3                            | 7                             |

|                  |                                             |               |     |     |     |      |      |
|------------------|---------------------------------------------|---------------|-----|-----|-----|------|------|
| <b>DIMAR</b>     | Outside of the<br>Cartel<br>SYRIZA splinter | Left          | -   | 6.1 | 6.3 | -    | -    |
| <b>KKE</b>       | Outside of the<br>cartel                    | Communist     | 7.5 | 8.5 | 4.5 | 5.5  | 5.6  |
| <b>LAOS</b>      | Governing Cartel<br>ND splinter             | Radical Right | 5.6 | 2.9 | 1.6 | 1    | -    |
| <b>To Potami</b> | Outside of the<br>Cartel                    | Center        | -   | -   | -   | 5.47 | 4.09 |

Sources: Hellenic Ministry of Interior; Chiaramonte and Emanuele (2017).

Note: Volatility for 2015 can only be calculated after the next election has taken place. To Potami, founded in 2014, blended economic liberalism with social democracy.
